# Supplementary material for: Complex organizational structure of the genome revealed by genome-wide analysis of single and alternative promoters in Drosophila melanogaster
Source: Springer Nature journal article supplement (doi:10.1186/1471-2164-10-9), 2009-01-01
Supplement: Additional file 9 [file 1471-2164-10-9-s9.pdf]

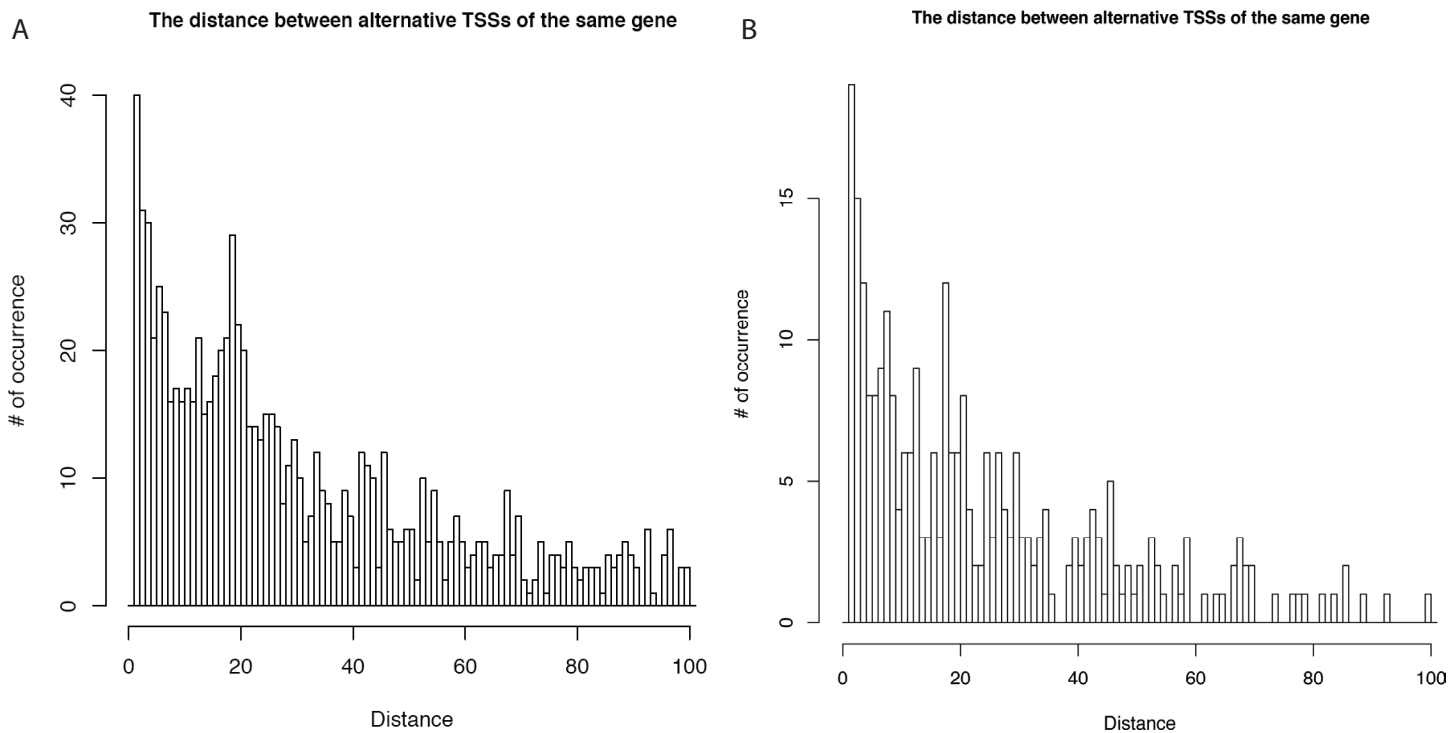

**Figure S5: Histogram of distances between alternative TSSs for the same gene in the fly genome when (A) all promoters are considered and (B) when only the “cap-supported” promoters are considered.** Alternative TSSs whose distances are shorter than a cutoff determined by the position of the second peak in the distribution were considered to derive from the same promoter.
